# Supplementary material for: N-glycosylation controls the function of junctional adhesion molecule-A
Source: PubMed Central journal article supplement — Mol Biol Cell. 2015 Sep 15;26(18):3205–14. doi: 10.1091/mbc.E14-12-1604 (PMC4569312; doi:10.1091/mbc.e14-12-1604), 2015-09-15
Supplement: supp_E14-12-1604v1_CombinedSupMats.pdf [file supp_E14-12-1604v1_CombinedSupMats.pdf]

# Supplemental Materials

*Molecular Biology of the Cell*

Scott et al.

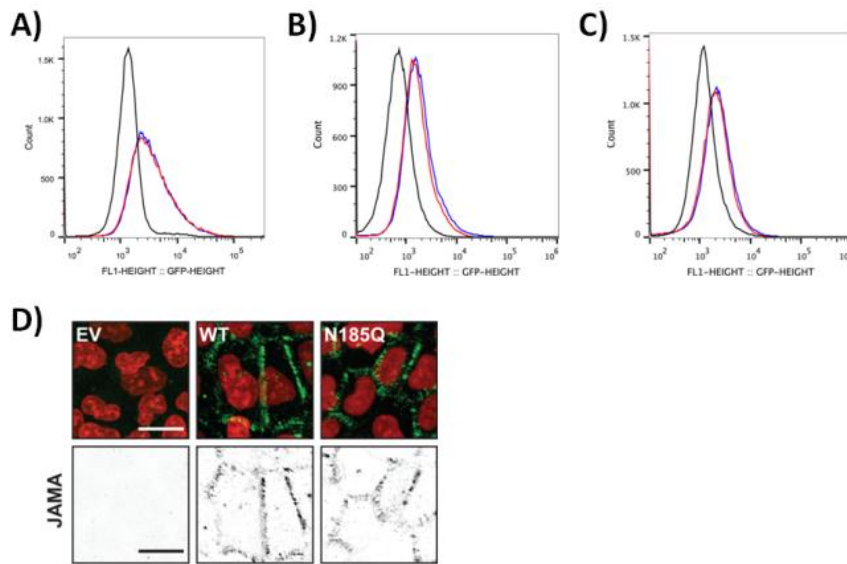

**Supplemental Figure 1.** Cell surface analysis of wt and N185Q JAM-A. CHO (A), HUVEC (B), or MDA-MB-231 (C) were transfected with empty vector (black line), wt (red line), or N185Q JAM-A (blue line) and assessed for cell surface expression of JAM-A by flow cytometric analysis. (D) CHO cells transfected with empty vector (EV), wild type (wt), or N185Q mutant JAM-A were assessed for expression and junctional localization of JAM-A by confocal microscopy. Top row represents pseudocolored staining of JAM-A (green) and nuclei (red). Bottom row represents inverted grayscale of JAM-A staining to highlight junctional localization.

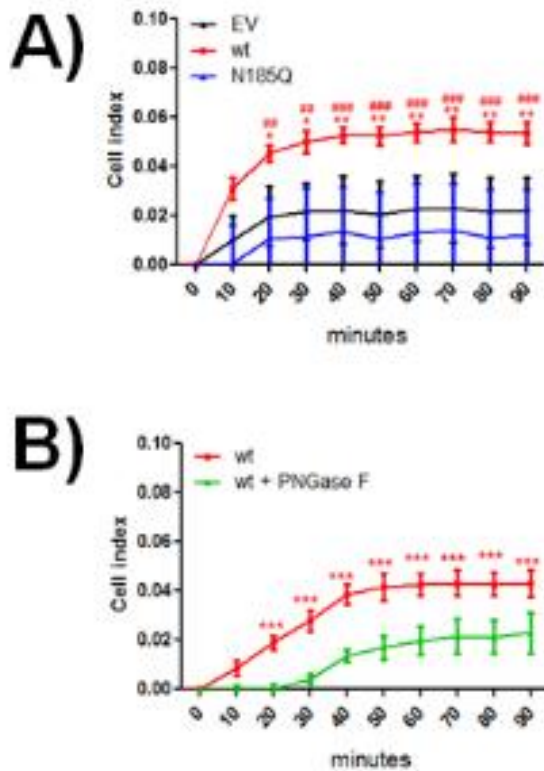

**Supplemental Figure 2.** N-glycans are required for JAM-A binding to JAM-A/fc. CHO cells expressing empty vector (EV), wild type (wt) or N185Q JAM-A were allowed to adhere and spread to JAM-A/fc (A). Cho cells expressing wt JAM-A were allowed to adhere and spread onto JAM-A/fc or to the same protein that had been incubated with PNGaseF to remove N-glycans (B). Data are representative of two separate experiments run in quadruplicate. In (A), \* represent  $p < 0.05$  versus EV, \*\* represent  $p < 0.01$  versus EV, ## represent  $p < 0.01$  versus N185Q, and ### represents  $p < 0.001$  versus N185Q. In (B), \*\*\* represent  $p < 0.01$  versus PNGaseF treatment. All analysis were conducted using two-way ANOVA with Bonferroni post-test.

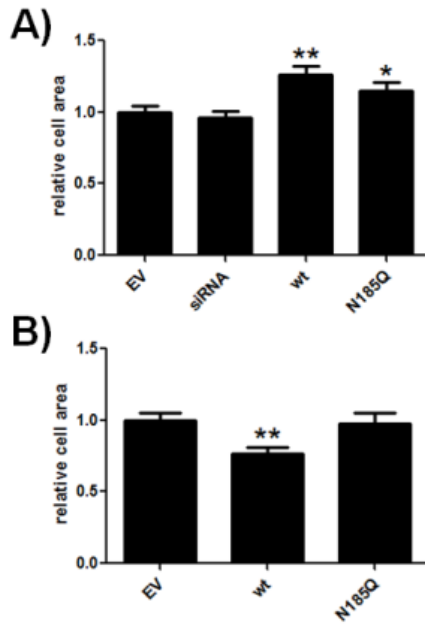

**Supplemental Figure 3.** N-glycosylation regulates JAM-A mediated effects on cell spreading.

HUVEC (A) or MDA-MB-231 (B) cells were transfected with empty vector (EV), siRNA against JAM-A (siRNA), wild type (wt) or N185Q JAM-A and cell size were determined for Alexa488 phalloidin stained cells plated on fibronectin for two hours. \*indicates  $p < 0.05$  versus EV and \*\* indicated  $p < 0.01$  versus EV by one-way ANOVA with Tukey's post-test. The number of cells analyzed in (A) were: EV 68, siRNA 59, wt 71, N185Q 63. The number of cell analyzed in (B) were, EV 34, wt 34, N185Q 32.

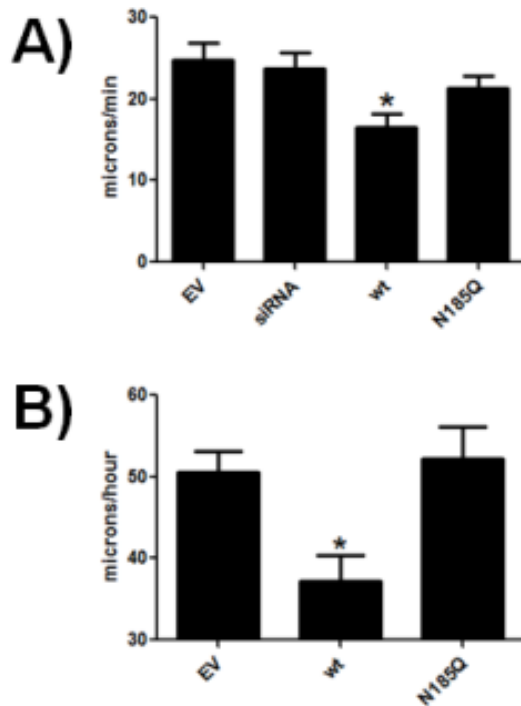

**Supplemental Figure 4.** N-glycosylation regulates JAM-A-mediated effects on cell motility.

HUVEC (A) or MDA-MB-231 (B) cells were transfected with empty vector (EV), siRNA against JAM-A (siRNA), wild type (wt) or N185Q JAM-A and random cell motility (velocity) was determined by time-lapse microscopy. The number of cells analyzed in (A) was; EV 65, siRNA 72, wt 65, N185Q 68. The number of cells analyzed in (B) was EV 38, wt 39, N185Q 28.

\*indicates  $p < 0.05$  versus EV by one-way ANOVA with Tukey's post-test

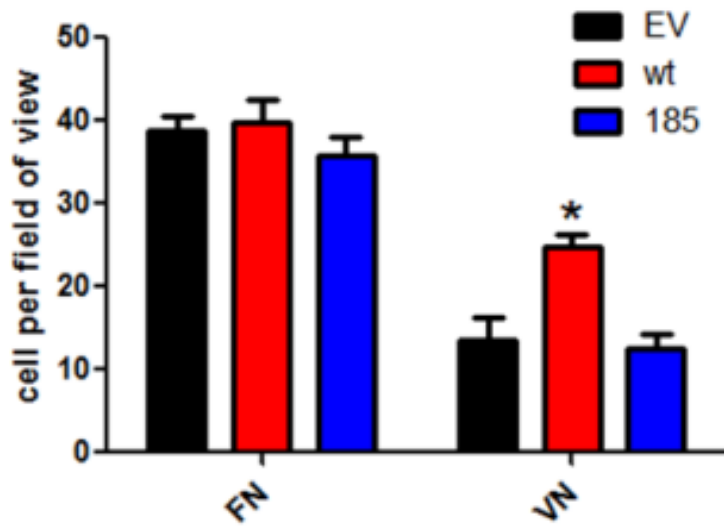

**Supplemental Figure 5.** JAM-A-mediated N-glycan dependent migration is matrix specific.

HUVECs were transfected with empty vector (EV), wild type (wt) or N185Q JAM-A, and

allowed to migrate towards fibronectin (FN) or vitronectin (VN) as described in methods. \*

indicates  $p < 0.01$  versus EV by one-way ANOVA with Tukey's post test. Data represent mean  $\pm$  SEM from two separate experiments run in triplicate.

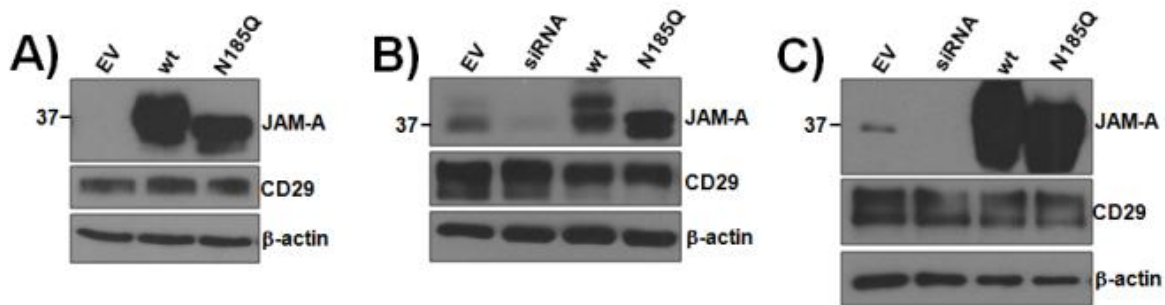

**Supplemental Figure 6.** Altering JAM-A expression does not change  $\beta 1$  integrin expression.

CHO (A), HUVEC (B), or MDA-MB-231 (C) cells were transfected with empty vector (EV),

siRNA against JAM-A (siRNA), wild type (wt) or N185Q JAM-A. Cells were lysed and analyzed for expression of  $\beta$ 1 integrin (CD29), JAM-A, and  $\beta$ -actin by western blot analysis. Data are representative of at least three separate experiments.

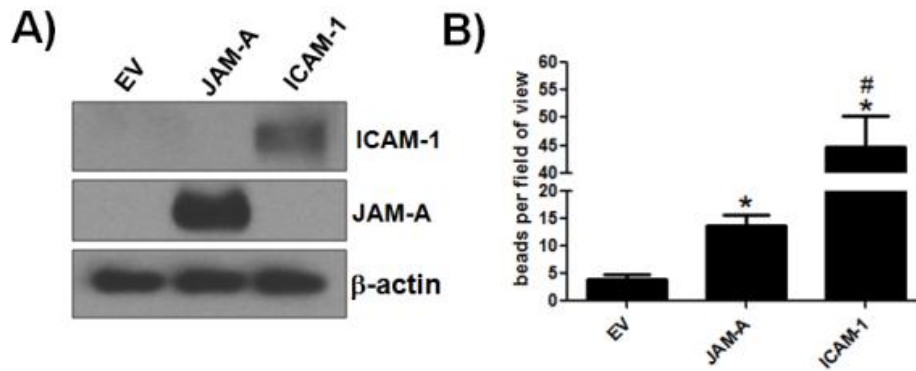

**Supplemental Figure 7.** JAM-A increases binding of LFA-1/fc coated beads. CHO cells were transfected with empty vector (EV), JAM-A, or ICAM-1. Cells were incubated with LFA-1/fc coated beads as described in methods. \* indicates  $p < 0.01$  versus EV and # indicated  $p < 0.01$  versus JAM-A by one-way ANOVA with Tukey's post-test. Data represent mean  $\pm$  from two separate experiments run in duplicate.
